# Supplementary material for: Is the Direct Soil Application of Two-Phase Olive Mill Waste (Alperujo) Compatible with Soil Quality Protection?
Source: MDPI journal article supplement (doi:10.3390/agronomy13102585), 2023-10-09
Supplement: s1 [file s1]

### Table S2 Statistical test details

**Table S2:** Details of the results of the statistical analysis of variance (ANOVA) and Tukey's honest significant difference test, for each soil sampling moment and parameter.

| Month | Parameter               | ANOVA   |         | Tukey - control and single |         | Tukey - control and double |         | Tukey - single and double |         |
|-------|-------------------------|---------|---------|----------------------------|---------|----------------------------|---------|---------------------------|---------|
|       |                         | F value | p value | t value                    | p value | t value                    | p value | t value                   | p value |
| 0     | Nitrate                 | 3.8     | NS      | 1.95                       | NS      | -                          | -       | -                         | -       |
| 0     | Kjeldahl total nitrogen | 7.9     | **      | 2.8                        | **      | -                          | -       | -                         | -       |
| 0     | Polyphenol contents     | 42.7    | ***     | 6.5                        | ***     | -                          | -       | -                         | -       |
| 0     | pH                      | 50      | ***     | -7                         | ***     | -                          | -       | -                         | -       |
| 0     | Electrical conductivity | 35.9    | ***     | 6                          | ***     | -                          | -       | -                         | -       |
| 0     | Organic carbon          | 22.1    | ***     | 4.7                        | ***     | -                          | -       | -                         | -       |
| 6     | Nitrate                 | 0.36    | NS      | -0.6                       | NS      | -                          | -       | -                         | -       |
| 6     | Kjeldahl total nitrogen | 9.1     | **      | 3                          | **      | -                          | -       | -                         | -       |
| 6     | Polyphenol contents     | 1.1     | NS      | 1                          | NS      | -                          | -       | -                         | -       |
| 6     | pH                      | 0.97    | NS      | -0.9                       | NS      | -                          | -       | -                         | -       |
| 6     | Electrical conductivity | 9.6     | **      | 3.1                        | **      | -                          | -       | -                         | -       |
| 6     | Organic carbon          | 15      | ***     | 3.9                        | ***     | -                          | -       | -                         | -       |
| 10    | Nitrate                 | 6.4     | **      | -1.5                       | NS      | -3.6                       | **      | -2.3                      | NS      |
| 10    | Kjeldahl total nitrogen | 10.2    | ***     | 1.1                        | NS      | 4.5                        | ***     | 3.6                       | **      |
| 10    | Polyphenol contents     | 74.1    | ***     | 1.5                        | NSA     | 11.7                       | ***     | 10.5                      | ***     |
| 10    | pH                      | 34      | ***     | -0.11                      | NS      | -7.6                       | ***     | -7.5                      | ***     |
| 10    | Electrical conductivity | 54.3    | ***     | 0.9                        | NS      | 9.9                        | ***     | 9.2                       | ***     |
| 10    | Organic carbon          | 14.8    | ***     | 1.8                        | NS      | 5.4                        | ***     | 4                         | ***     |
| 18    | Nitrate                 | 1.8     | NS      | -0.2                       | NS      | -1.7                       | NS      | -1.5                      | NS      |
| 18    | Kjeldahl total nitrogen | 0.7     | NS      | 0.5                        | NS      | 1.2                        | NS      | 0.7                       | NS      |
| 18    | Polyphenol contents     | 10      | ***     | 3.5                        | **      | 4.1                        | ***     | 0.6                       | NS      |
| 18    | pH                      | 0.8     | NS      | 0.5                        | NS      | 1.2                        | NS      | 0.7                       | NS      |
| 18    | Electrical conductivity | 2.9     | NS      | -1.4                       | NS      | -2.3                       | NS      | -0.9                      | NS      |
| 18    | Organic carbon          | 1.5     | NS      | 0.9                        | NS      | 1.7                        | NS      | 0.8                       | NS      |
