# Supplementary material for: Is the Direct Soil Application of Two-Phase Olive Mill Waste (Alperujo) Compatible with Soil Quality Protection?
Source: MDPI journal article supplement (doi:10.3390/agronomy13102585), 2023-10-09
Supplement: s1 [file s1]

**TABLE S1: Experimental parcel data**

S1: Table of experimental parcel locations, crops and variety, and sizes of experimental areas.

| Province  | Municipality | Coordinates<br>UTM            | Crop/variety                 | Application<br>area (m <sup>2</sup> ) | Control<br>área (m <sup>2</sup> ) | Single or<br>double<br>application |
|-----------|--------------|-------------------------------|------------------------------|---------------------------------------|-----------------------------------|------------------------------------|
| CASTELLON | TRAIGUERA    | X:271132.21<br>Y: 4491482.31  | Olive/Regues                 | 15,000                                | 5,000                             | Double                             |
| CASTELLON | XERT         | X:259131.95<br>Y:4488491.27   | Olive/Morrut                 | 10,000                                | 2,000                             | Double                             |
| CASTELLON | LA JANA      | X:266109.67<br>Y: 4488828.18  | Olive/Farga,<br>Cuquello     | 17,000                                | 3,000                             | Double                             |
| CASTELLON | SANT JORDI   | X: 274250.98<br>Y: 4487219.97 | Olive/Morrut                 | 20,000                                | 3,000                             | Double                             |
| CASTELLON | VINARÒS      | X: 277213.71<br>Y: 4489132.29 | Carab                        | 30,000                                | 3,400                             | Double                             |
| ALICANTE  | SAX          | X: 691188<br>Y: 4270195       | Olive/picual                 | 5,790                                 | 2,066                             | Single                             |
| ALICANTE  | ALFAFARA     | X: 712166<br>Y: 4295005       | Apple/Perello                | 3,660                                 | 975                               | Single                             |
| ALICANTE  | VILLENA      | X: 688709<br>Y: 4276742       | Olive/picual                 | 10,900                                | 4,767                             | Single                             |
| VALENCIA  | ENGUERA      | X: 699851<br>Y: 4316019.75    | Olive/Picual y<br>Villalonga | 6,700                                 | 2,500                             | Single                             |
| VALENCIA  | ANDILLA      | X: 687572.24<br>Y: 4404889,45 | Almond/Lauranne              | 5,320                                 | 2,736                             | Single                             |
| VALENCIA  | BENIGANIM    | X: 723348.87<br>Y: 4315948.47 | Olive/Picual                 | 2,400                                 | 600                               | Single                             |
